# Supplementary material for: Variable Populations of Grapevine Virus T Are Present in Vineyards of Hungary
Source: MDPI journal article supplement (doi:10.3390/v13061119), 2021-06-10
Supplement: s1 [file s1]

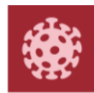

# Variable populations of grapevine virus T are present in vineyards of Hungary

Emese Demian<sup>1x</sup>, Aliz Holczbauer<sup>1x</sup>, Zsuzsanna Nagyne Galbacs<sup>1</sup>, Nikoletta Jaksa-Czotter<sup>1</sup>, Mihaly Turcsan<sup>2</sup>, Robert Olah<sup>2</sup>, Eva Varallyay<sup>1\*</sup>

\*corresponding author: [Varallyay.Eva@uni-mate.hu](mailto:Varallyay.Eva@uni-mate.hu), Hungarian University of Agriculture and Life Sciences, Szent-Györgyi Albert Street 4, 2100, Gödöllő, Hungary

```
>NC_035203_GVT Grapevine virus T isolate Cho replicase (ORF1), TGB1 (ORF2),  
TGB2 (ORF3), TGB3 (ORF4), and CP (ORF5) genes, complete cds.  
CGCGGATAAACACAGAACCCGAACGGCCATACATCAAAGTGGTACAACACTACTTTCACGTAATGGCTCTTCACCA  
CCGTTCTGCTGCTGCTGAGGTGCTCGCCCGACTCACCTCAGATGAACAATCTAGAGTTAGTGCTCCAACAGTAA  
ATCCTTGTGTGATGATGAGGAACAGGCCGGTGGTTTTTTTAACTACAGCCTATCACAGAAGGCGCAGGAAAAATT  
GGAGCTCTCTGGTATCTATTTGAGCCCACTTAGTTATAAGCCACATTCCCACCCTGTGTGCAAACTCTAGAAAA  
TCATATCCTCTACAATGTATTACCTAGTTACTTAGACAATAAGTTTTATTTTGTAGGGATTAAAAATTTCAAATT  
AGATTTTATTAGAAGTAGAAATAAAAGGTTGTCAATGGTTGAATCTGTAAATAGGTATGTCACCTCATTAGATAG  
ATCCAGGTATTGTAACGAGCTAATCCATAGGAGTTTCAAGCATCGGATCTACACCTTGCCAGAAAGAGAGGTTTCAA  
TGGATTGCCAACCTTAGCAAACCTTATTTCCCCCACTTGAGAAGAAAGGGGCGGAATTCATCTTTCTCCATGATGA  
GTTGCACTACTGGTCTCCTTCTGTGTTATTAAATTTTTTGGAGGCCATTAAGCCAACAACCTGTGCTAGCCTCTAT  
TGTTGTCCCTCCAGAGTTGCTCGCCAAATCCAAAGAGAGTCTTAATCCATGGGCGTACAAATTTAAGATCATTAA  
GGATCGCCTGGTCTTTGCCCCAGATGGAGTTTGGGCTGAGGCTTATGATCAACCTTGCGATGCAAGTACTTGCT  
CAAGACAAGGCGGTTTCTGCTTGGTGATGGCTCTGTGTATAGCGTGATATTGTTTCAATCTAAATCTGCCACCA  
TCTGATAAGCATTACACGCGGGGAATCATTGAATCAAGATCGCAGGTTCTTTGGAGATTTTGACGCAATCGGGCT  
TGGTGCCTTGGGCAAGTTGAGTAGGAATGTCAAGCATTGCTATCCAATAAGTGTTCAAGTAGTCACCAAAATGTA  
CTTGATCCTCATGACCTTAAAGAAGCCCGATGAGGAATCAGCTGAAGCCAACTAAGGCAGCTAATTAATGATCC  
AACTGGGAGAGAGATCAAATTCGCTGAGAGTTTCTCTAGACTGATTTTGAAATGCAAGAAAGAGAGCTCACTGTT  
TCTTCCAAGCTTGACAAAAGACTGCAAAAATTTTTTAATAGGGCTGTTCCAGGTTTTATATCAAGGATGTTCCA  
GATCTACAAGGATAAGTGTCTGAGTGACTTCATTTATGATCTAGAACCATTTAATTTTTATGTTGACACCGTTGA  
TGTTAAAGGGGACTTCTCTGATGAATTTGAGTTTTGGGACTTACATGATTTACTTGATTCAATTTGATGTGAGTGA  
AGGGATTGATGATATGAAAGTCACCATAAAGAATTGGTGGAACACAAGGTCACCACAGAGCTACTTCATCGGCGG  
GAGAGAGTGGGAGAGTAGCAGTTCAAATTTTACTCTAAGTTCCAGGCTTTTGAACGAGTTGGGGACCTTTACCG  
CTACCTCTTACAAGATCTTAGTCATGATATGGTGAATGAAGAAGTTGTGGTTCGGAGATTGCGGGACTTTTTGAG  
AAGAAGGGGCACTGAGAGTCTTGATATATGATATCGTGCAATTTGGATATCACAGCATTGAAGAAAATGTCTT  
TAACTGGACCTTGGAGGCCAGGAAGGAGAATTGGCTGCGTGTGGTGCCTCCGAGTGGTTTCTACTTGTGGGAG  
AATTAACACTAAGTTCAATTTGTGAATCGAGTAGTTCCATCTCCAACCTGTCTGTTGAAAGTGTCATCTTTATCG  
TTCAATTGTGAAAGAGGTTGAAAAGTTCAAATTAGAAAGTCTTGATAGAGTGTTTTGGAGGCCAACTAGTTCCGC  
CATGGAATTTGGAGGGCCAAAGTTTGAGATAAGCGAAGAACCTGTAGTGAGGTTGAAGAACAATGTGCCCCCTGA  
AGAGGTGATTGATGTTGGTTCTAAACAAACCTCAGCCGTCATTGATGCCGAAAGCCAAGCTACGGCTCCAAGTTA  
CGTTGACTGCACCTCGGTTAGCATTGATGAAATCAAGATTGACATTGGAAATTCAGTGAGCTGAAATTTTATTA  
TGGAGTGCTGAAGTTTCTGATGTCTTGAAGGGGCGCAAGGCCGGTTTTTATGCAAAATCCGGAATTAATCCTA  
TGCTTATAATGGTGGAAGTCATGACAGTATGGGATGGCCCAAGCACTTGATGAAATCCTTAGGCTGGTTGATGG  
CGGTCTATATTACAACAGTTGCTTGGCACAAAGGTATGATGGTGAGCCTCAATTGGGATGCATTCTGACAATGA  
GAGGTGCTATGCTGTTGGGCATAAGGTGCTCACTGTCAACATGCTTGGGTCATGCCAATTTCTACATATGCAGGAA  
GCAAGATCGCAATCTCAAGGAGCGGCACATAAATTTTAGGCTCAGAGAAGGTGATTATTTTGGAGATGCCACGTAA  
TTTTTCAGGAGAATTATCTGCACGGAGTTCTGTGAACAAGTGATGGTTCGAATATCTTTGACCTTCAGGAGGCAGCT  
AGTCCCTGATTTCGGGTGATGATGAGGAGGAATGCAGCCATTTGCATTCGGCAGCATTGACAGGATTGCTGGCCG  
AAAATTTTGGCCTGAATGCTCAAATTTTGGCAGCGATGATTGATGGTAGTGGAAGGGAAGAGAATTGGATCT  
TTGTGATTGTTTTCTTGTCCAAATCACTTTTCGGCATGCCAAGAACATTGACGGGATAAGAAAGGTTTTTTTCAGC  
CACTGGGTTGGCAGCTGGAGACAGAGTTCTGGTTTTTAAATTCAAATCAAGTAAGGCAATTTTGGAAAAATTCGA
```

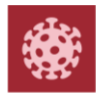

AAGGTTGAGGGTTACAATTGCTGTTTTCTCTGGAAAGATTGAGTTTCTGGATGGTCTTGTCCCCGGGATTGTGAG  
TGATGGGGACCTCAGGGAGGTGAAGAACTTTTCAGTGCAGAATCTGAAAGTTGAGCTGGCAGTCATTATTTTCCG  
TGGTTCAACAGTATCTGGCTCGAAGGTGCGGGTGACAGAGGGGAATGCAAGTTCAGTGGAGCGAGTGAGGTATT  
ATTTGGCTGCAATTTGATTGCTACTGATGAATATTCAATTGGAAATTTTAACTTATTTCAAGTTCAGCTGACGG  
TAATTGCTTCTGGCACTCTGTGGGCCATTTGATGAATTGCAATGGCCTTGATTTGAAGAGAGGTGTTTTTAATAA  
ATTTAGAAGCTCAGGTTTGGAAATCAGTGAAGCTTGAACATCAGTTGGAGCCAAATGTTTTTGCAGAGAATGAGGT  
AATTGCATACTTCTGTGGTATGCACAAAAGGCGACTAATAATATTAACCCAGAGTATGATGTTGAGTGGAATTT  
TGGTGAGAAGAAGTGGCCATTACTTGGCTTTCTGTGTCTCGTGCAGCAGCATTTCAGCCATGCGCGCCAATAA  
TGGATGCATGATTAGGGCCGTGCTGAAGCCCTTGGAAAGCGAGAGGTTGATGTACTTAATTACCTGTGTCAGGA  
TGCAACCAGACATATATTTGAAGAAGTTTGCCAGGGCGCTGGTCTCAACTTGATGTATTTGGAGGCCGTATTTGA  
AGCTTTTGACATTTGTGCTAAATGTGACTTTGGGGACAGAGTTGAAACATTTAATAACTCAGGCTCAGTAGTTGC  
ATTGTTTCGATGTTTTAGCTGAACACATAAGGTGTGTGCCGAAGATTTCTGACAAGCCCATGAGTGTGAGGGTTGA  
TGCCATGAGGAGTGTAAGAAAGTCTGAAATTGAGATGCTTGGCATGAACGGAAGTTGGATTGAGTATGAGCCACA  
GGTGGCTAGAGCTGAAAAATTGGAGAAGTGCTTGCTTGGTCTTACTGGAGTGATGTGCAGTGAGAGGTATGA  
CAACCAAAAAGCTTGGCTGGATAACATTGCCAAAGATCAAAGGGGTAAACGCAACATTATGGCCATAATGGGTAC  
TTTTGGAAGTGGAAAGAGTCATGTTTATAAGACTTTTCATGACCCATGCAGTTGGAAAAATTTGTAACATTTGTGTC  
TCCTAGAAGGCAGTTGGCTGATAGCATTAAAGGATGATCTGGGTCTTTATAAGGATAAACTTGGGAAAAACATTGAG  
AAACAAATCCCAAGAGGGGTGGAGCGTGGTTACTTTTGAAGTTTTCTTAAAGACCATTCCACAACCTTAAAAAAGG  
GCATGTGGTCATTCTTGATGAAATTCAGCTATTTCCGCCTGGCTATCTGGATCTTTGCCTACTCGTGTGAGATAA  
GTCCTGCATTTTCTCAGTTGCAGGCGACCTTGCCAAAGTGGCTATGATTCAAAGAGCGATAGAAACATTTGGG  
GGCTCTAGATTCTGATATATTTGAGCTGTTGAGGAACAAAGAATACTCTTACAATGTTGAGAGTAGAAGGTTCAA  
AAACCTATGTTTGAAGGTAGATTACCATGCCGTTTTTGAAGGGATCATTGCACGAAAAACATCAGGATTTTGT  
GGTGTGGAAGTCTATGGAGGATTTGGTCTTTGGGGAGAAATTTAAGATCGATGCATTCTGGTGAGTAGTTTTGA  
GGAGAAAAGGATAGTATGGTCACATTTTGGATCTGCAGTCACCTGCCTCACATTTGGGGAATCAACAGGTCTGAA  
TTTTAACGAGGGAGTTGTGTTAATAACTTATGATTCAATTCAGACAGATGACAACAGGTGGCTAACTGCATTGTC  
GAGGTTTCAGGATGAACATCCATTTTGTCAATTTATTGGGGATCCCCCTGGAAAGGGCAATAGGACATTTTCGCTGG  
CAAACCACTTTATCACTTCATGTCTAAGAAAAGTGGAGAAGCAATCATACTTGACATGCTACCTGGCTGCCCCGAA  
GTTCAAAAATGGATTACAGCATCTCTATTGGTAAGGATGAAGGAATTAAGGAGACAAAACCTTGCAAGGTGATCCATG  
GTTAAAGACAATGTTATTTTTGGGTCAAAATGAGGATATTGAAATAGAAGAAATGGAGGAGGAATTTAAAAATGA  
AGAGTGGTTCAAAACTCACTTACCTATTACCTCCATGGAATGCTCAAGGGCTAGGTGGGTGCGAAAACCTTGCACT  
GAGGGAAAGTAGAGAGGTGAGATGTGGAATGAATACCACTGAGCAATTTAAGGATGATCACCATGACCTTAAAGG  
GGTTTTGATGACAAATGCATGCGAGAGATATGAATCTATATATCCAAGGCATAAAGGCAATGACAGCGTCACCTT  
TTTGATGGCTGTTAAGAAGAGGTTGCGTTTTTCTAGTGTCTGCAGTGGAGGAAGCATTGCTCAGAAAGGCTATGCC  
ATTTGGGAAGTTCCTTCTTGGAAAATTCTTGAAAAATATTAAATTGAAAAGGAACCACAATCCACGAATGATGGA  
GGAATCAGTGGCGGAATTTGAGGAGAAGAAGACCAGTAAGAGTGCTGCAACAATTGAGAATCACAGCGGGCGATC  
ATGCAGGGATTGGTTGAATGACGTTGCCTTGGTTTTTCATGAAGTCACAACACTGCACGAAGTTTCGACAATCGGTT  
TAGAGATGCCAAGGCAGGTCAAACCTTGCCTGCTTCCAACACTCCGTGTTGTGCAGGTTTCGCGCCATACATGAG  
GTACATTGAGAAAAAGGTTCTTGAAGCCTTACCTGAGCGATTTTACATTCATTCTGGGAAGGGTTTGGATAGTCT  
AAAGGCCTGGGTGGTTGCAAATGATTTTTCGGGGGTGTGCACTGAGTCCGACTATGAAGCCTTTGATTCATCTCA  
GGACCATTACATTCTGAGTTTTTGAATTGAGCTGATGCGGTATTTTCGGGCTTCTTAATGATCTAATCCTTGACTA  
TCAGTTCATAAAGACTCATCTGGGCTCCAAGTTGGGGAATTTTGCAATAATGCGGTTTACAGGTGAAGCTTCAAC  
TTTTCTGTTCAATACGCTAGCCAACATGCTATTTACCTTTTTTAAGGTATGATTTAACTGGTGCGAGAGCATCGC  
ATTTCGCTGGAGATGACATGTGCGCGAACAAGCGTCTGAGGGTGACTAAAGAGTATGAGGATTTTCTAACTAGGAT  
TCGGCTGAAGGCTAAGGTGCAATACGTAGCTAGCCCCGACCTTTTTGTGGTTGGTGTCTATTCAAGAATGGGATTTT  
TAAGCGGCCACAGTTAGTCATGGAGCGAATAAACATCGCCAGGGAGATGAACAATTTGGACAATTGCATAGACAA  
TTATGCAATTGAGGTTTCATATGCCTATTCTTTGGGTGAGCTTGCAAGTGGAGGTGATGAGTGATGAGGAGCTCGA  
GGCTCATTATAATTGCATTGCTTTTTTGGTGAAGTACAAGAATAGGATGAAGAGTTCCATTAAAGGAGCTCTTCTA  
GTTAGTAGTGCTAGTCAGCAGTTAGGTGAAGCTTGTTTCATTGATTTATCTTGTGTGATGAATAATTTGGTTTTCTG  
CTCTTGAGTTGTTTTGGGTTTTGTTAGAATTAGCGAGGAAGCTAGATATCCCTTAGTCATTTCATAGTGTCCCTGGAA  
GTGGAAGACAAGTTTTGATCAGGTCTTTGATTAAGTTGGACGGTGATTTTGAAGCATTTACAGCTGGAGTGCCGTG  
ACACACCAACCTTGAGGGGTGCTACATCAGATCCCCTTTGAGGGTGTGCTTCAAATAAAAAGTTGAGCATTC  
TGGACGAGTACCTCACAGTTGAGAATTGGGAAGGGTTTGACGCACTGTTTTCTGACCCCTACCAGAACGATAAGA  
GCCCTCTCGTGGCCTCCTACGTGTCTAAGAAGACCAAGAGATTTGGAAAGTCAACTGTGCGTACTTAGCAGATT  
ACGGCTTTGAAGTAGAGAGCGAAATTGAGGATTTAGTGGTCAGGGGTTACCATTGAGCTCAAAGTTGAAGGGC  
AATTGATTTGCTTTGGGAAGCTGCAGTCGAGCTTGCAATTAAGTCACTGTGCAGAGTTCAAATTGCCTTGTGAAG  
TAAGAGGTTCCACATTTGATGTGGTTACGCTGTTGAAATCAGAAGAGCCAAGCTCAGTGAACAGGCATCTGTTTT

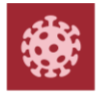

ACGTCGGATGTACAAGGCACAGGAAGAAGCTTATAATTCTTGAGTAATTGATGTCATTTTCAGCAACCAGCCAATT  
GGTCTAAATCACTAAGGCCTGTGTTGATTGGTGCCGGAGTTGCAATTGTGATCCATTTTCTAAGAGAAAAGTAATC  
TGCCACATGTTGGAGATAACCTGCATCACCTCCCACACGGAGGAAGTTATCAGGACGGAACAAAGAGAATAACCT  
ACTGTGGTCCTAAGAAAGAATATCCAGGTACTGGTCTCTTTCAACTTGGGAATTCCTAACTGCAGTTGTGTTGG  
TTCTTGGCTTGTCACTCTTGATCTATGCAGTGGAGAAGTTTGGCATTGGGACTTATAGGGGCTGTGCTTGCAACC  
CTAATCCTTGCCTATGTAGGAGGTGAGAGAGGCGGCAGTTGCTTCATAAGGATCACCGGTGAGTCCGTCACTGTG  
TCCAACGTGTGGAACCTTCAAGAGGTGCCAGAAGTGATCAAAGCGGTGAAAGGAGTGTGGTCCTCGTTAGGTGCA  
GGGGTAAATTTTGATTTGGAAGGCAACTGCAGTTGAAATGGCGTCGAATGAAGAGCTGAGGAAGCTAGAGGAGAA  
AAGGCAGAGGGACGAAGCCAAGACACTTGGGAAGGAAATAGAGGGTGCAGGAGGAAGCAGACCAGCATTGCCAGA  
TTTGGGAACAGTAATTTAAAGGAAGAAAAAGCAGATTGAAAATGCTTTGAGCGCCAAAGTTAACGTGAAAGATCT  
GATGGAGAGGGAATTTGGCCTCCAGTCAAACAATGTCATGAACAACAATGATATCCTTGCCATTTCTAGCATATT  
TACAGAAGCAAAGATACCAGAAGATCTGCAGCAACATACTGCAATAGAGGTCGCTAGAATGGCTGTGGATGTTGG  
CAGCTCAAAACATTCAGAATTCATGGGAAAGAGCGTTGTATGTGGGCATGACTTATCGGCAATTGTTGGCTACAT  
AAAGGAAGTGACTACACTGCGCAGGTTTTGCATGTATTACTCCAAAGTGATATGGAACCTTGCTTATCAAGGAAAA  
GACTCCTCCCGCTAATTGGGCAAAGAAAGGGTTTTAAAGATGAGACAAAATTTGCAGCCTTTGACTTCTTCGTCGG  
TATCTTCGATGAAAGTGCATTGGAGCCGGAGGGGGGCTTGGTGAGGTCACCCACACAGAGTGAGCTTAAGGCAAA  
TATTTCTGCTTTGGAAGTGAAGGTTTTTCAGGCAAAAAATGAGTGAAGGTAACAGGTCTTTAAACTTTGGGGGAAAT  
AAGCGGGGGAGCCATGGGTGCTCCAGCTTACAATCCATTTGGGGGAGATTGATAAGTTTTAACTTTTGGTGTTTC  
TGCTGATTAATGATCAGCACTTGCTGAAGCTTGAGAGTTGCTAGTTGGAACCTTTGCCGAGTCAACTTTATAGT  
ATGTGCGACACCCATTTTCGATAGGGCAAATGTTTCGCTGGCATAACCGTACTAATAGTATGCTTCTATCTAACTGAC  
GATCCTAAGACCTAAATAATTATATAAGGGAATCGTCAATAAATAAAAAATGCGTTGAGAGTTGCTAGTTGGAAC  
C
