# Supplementary material for: Variable Populations of Grapevine Virus T Are Present in Vineyards of Hungary
Source: Viruses. 2021 Jun 10;13(6):1119. doi: 10.3390/v13061119 (PMC8230486; doi:10.3390/v13061119)
Supplement: Supplementary file 1 [file viruses-13-01119-s001.zip › Supplementary Tables to Demian et al.xlsx]

## Sheet: STables
Supplementary Tables for
Communication
Variable populations of grapevine virus T are present in vineyards of Hungary
Emese Demian1x, Aliz Holczbauer1x, Zsuzsanna Nagyne Galbacs1, Nikoletta Jaksa-Czotter1, Mihaly Turcsan2, Robert Olah2, Eva Varallyay1*
*corresponding author: Varallyay.Eva@uni-mate.hu, Hungarian University of Agriculture and Life Sciences, Szent-Györgyi Albert Street 4, 2100, Gödöllő, Hungary
Table S1
Basic information of the sampled plantations with the number of sampled individuals and library code
Table S2
Bioinformatic analysis of the small RNA HTS results of the vineyard survey (GSE106240) investigating the presence of GVT
Table S3
Bioinformatic analysis of the small RNA HTS results of the rootstock plantation survey (GSE130994) investigating the presence of GVT
Table S4
Sequence and annealing temperatures of the used of PCR primers for virus detection with their appropriate references
Table S5
List of sampled varieties in the vineyards together with the result of GVT specific RT-PCR
Table S6
List of sampled varieties in the rootstock plantations together with the result of GVT specific RT-PCR
Table S7
List of sampled varieties in the rootstock variety collections together with the result of GVT specific RT-PCR

## Sheet: Table S1
	Table S1
	Basic information of the sampled plantations with the number of sampled individuals and library code
	Library code	Vine growing region	Place of the plantation	Variety	Number of tested plant		Library code	Vine growing region	Place of the plantation	cultivar	Number of tested plant
	1_TK	Sopron	Sopron	Kékfrankos - Blaufränkisch, Lemberger	10		1_BSZ	Balaton	Balatonszárszó	Fercal, S.O.4	9
	2_PH	Pannonhalma	Pannonhalma	Olasz rizling - Welschriesling	10		2_BB		Balatonboglár	5C, 125AA, Fercal	12
	3_HT	Neszmély	Neszmély	Chardonnay	10		3_FH	Zala	Figyeháza	5C, Fercal	12
	4_PP	Villány	Villány	Cabernet Sauvignon	10		4_BH		Becsehely	Fercal	8
	5_CS	Balatonboglár	Balatonboglár	Csabagyöngye - Pearl of Csaba	2		5_ZE		Zalaegerszeg	Ruggeri, Georgikon, 125AA, 5BB, Fercal, S.O.4, 5C	18
	6_MP	Szekszárd	Szekszárd	Merlot	10		6_ZG		Zalaszentgrót	5BB, Fercal	9
	7_FP	Kunság		Generosa (new variety)	10		7_NG	Balaton	Nemesgulács	5BB, fercal, S.O.4	10
	8_ET	Eger	Eger	Kadarka (propagation material was virus tested)	10		8_MT		Mogyorósi-Hegy Tapolca	Fercal	11
	9_SZHT	Tokaj	Szegilong	Furmint	5		9_MR		Mogyorósi Raposka	5C, Georgikon, Berlandieri	12
	10_EH		Erdőbénye	Furmint, old *	5		10_V	Villány	Villány	5BB, 5C	11
	11_SZHU		Szegilong	Furmint, new	5		11_P	Pécs	Pécs	*variety collection	34
	12_DF		Erdőbénye	Furmint, old*	8		12_KSZ		Kővágószőlős	5C, Fercal, S.O.4, 125AA, Paulsen, Ruggeri, Richter	18
	13_BV		Bodrogkisfalud	Old Hungarian varieties	5		13_SZ	Szekszárd	Szekszárd	5BB, Fercal	12
	14_MK1		Mád	Furmint T85●	2		14_AD	Eger	Aldebrő	5C, 5BB, 125AA, Fercal	14
	15_MK3			Hárslevelű K3●	1		15_TC	Tokaj	Tarcal	*variety collection	33
	16_MK4			Sárgamuskotály●	1		16_TC2		Tarcal 2	5C, Ruggeri, Harslevelu	9
	17_MK5			Teleki-Kober 125●	1		17_LB		Legyesbénye	Fercal, S.O.4, 5BB, Börner, 5C, Georgikon	11
	18_MK7			Teleki-Kober 5C●	1		18_AS	Mátra	Abasár	5C, S.O.4, Ruggeri	8
				* different plantations			19_TB	Balaton	Beled	5BB	7
				● same plantation, different rows

## Sheet: Table S2
	Table S2
	Bioinformatic analysis of the small RNA HTS results of the vineyard survey (GSE106240) investigating the presence of GVT
	Library code	Bioinformatics Analysis		GVT_ref	GVT_cons	RT-PCR		Library code	Bioinformatics Analysis		GVT_ref	GVT_cons	RT-PCR
	1_TK	n of virus specific contig		0	0	10/10		11_SZHU	n of virus specific contig		0	0	0/5
		n of virus specific reads	Redundant	1929	2767				n of virus specific reads	Redundant	452	456
			RPMR	136	195					RPMR	40	40
		coverage	%	64	70				coverage	%	31	20
	2_PH	n of virus specific contig		0	0	9/10		12_DF	n of virus specific contig		0	1	8/8
		n of virus specific reads	Redundant	952	1002				n of virus specific reads	Redundant	1155	1266
			RPMR	87	92					RPMR	132	144
		coverage	%	40	30				coverage	%	41	44
	3_HT	n of virus specific contig		0	0	0/10		13_BV	n of virus specific contig		1	1	5/5
		n of virus specific reads	Redundant	604	592				n of virus specific reads	Redundant	600	739
			RPMR	54	52					RPMR	67	83
		coverage	%	30	20				coverage	%	39	40
	4_PP	n of virus specific contig		0	0	7/10		14_MK1	n of virus specific contig		0	0	2
		n of virus specific reads	Redundant	585	575				n of virus specific reads	Redundant	977	1033
			RPMR	57	56					RPMR	112	118
		coverage	%	31	22				coverage	%	43	41
	5_CS	n of virus specific contig		0	0	1		15_MK3	n of virus specific contig		0	0	0
		n of virus specific reads	Redundant	607	635				n of virus specific reads	Redundant	559	661
			RPMR	68	71					RPMR	57	67
		coverage	%	43	32				coverage	%	24	28
	6_MP	n of virus specific contig		0	0	0/10		16_MK4	n of virus specific contig		0	0	0
		n of virus specific reads	Redundant	554	490				n of virus specific reads	Redundant	340	287
			Redundant*	63	56					RPMR	37	31
		coverage	%	41	27				coverage	%	31	17
	7_FP	n of virus specific contig		0	0	0/10		17_MK5	n of virus specific contig		0	0	0
		n of virus specific reads	Redundant	340	313				n of virus specific reads	Redundant	306	370
			RPMR	42	38					RPMR	28	34
		coverage	%	25	15				coverage	%	16	10
	8_ET	n of virus specific contig		0	0	10/10		18_MK7	n of virus specific contig		1	1	1
		n of virus specific reads	Redundant	885	1063				n of virus specific reads	Redundant	607	831
			RPMR	93	112					RPMR	69	94
		coverage	%	58	52				coverage	%	44	40
	9_SZHT	n of virus specific contig		1	1	4(5)/5
		n of virus specific reads	Redundant	2233	2361
			RPMR	216	228
		coverage	%	54	53
	10_EH	n of virus specific contig		0	0	4(5)/5
		n of virus specific reads	Redundant	1122	1348
			RPMR	102	123
		coverage	%	46	46
		RPMR=	number of redundant virus specific reads/million sequenced reads

## Sheet: Table S3
	Table S3
	Bioinformatic analysis of the small RNA HTS results of the rootstock plantation survey (GSE130994) investigating the presence of GVT
	Library code	Bioinformatics Analysis		GVT_ref	GVT_cons	RT-PCR		Library code	Bioinformatics Analysis		GVT_ref	GVT_cons	RT-PCR
	1_BSZ	n of virus specific contig		0	0	0/2		11_P	n of virus specific contig		0	0	0(3)/34
		n of virus specific reads	Redundant	1801	1830				n of virus specific reads	Redundant	1979	3254
			RPMR	92	94					RPMR	100	164
		coverage	%	59.5	45				coverage	%	76	52.5
	2_BB	n of virus specific contig		0	0	0/3		12_KSZ	n of virus specific contig		0	0	1/7
		n of virus specific reads	Redundant	1128	1227				n of virus specific reads	Redundant	1676	2423
			RPMR	83	91					RPMR	89	129
		coverage	%	50	35				coverage	%	75	51
	3_FH	n of virus specific contig		0	0	0/2		13_SZ	n of virus specific contig		0	0	0/2
		n of virus specific reads	Redundant	1063	1075				n of virus specific reads	Redundant	2282	2385
			RPMR	71	71.5					RPMR	86	90
		coverage	%	58	39				coverage	%	75.5	53
	4_BH	n of virus specific contig		0	0	0/1		14_AD	n of virus specific contig		0	1*	0/5
		n of virus specific reads	Redundant	1349	1274				n of virus specific reads	Redundant	1711	1805
			RPMR	80	75					RPMR	89	94
		coverage	%	60	38				coverage	%	68.5	49
	5_ZE	n of virus specific contig		0	0	0/7		15_TC	n of virus specific contig		0	0	10/33
		n of virus specific reads	Redundant	1166	1821				n of virus specific reads	Redundant	2176	3812
			RPMR	74	116					RPMR	119	208
		coverage	%	67	49				coverage	%	65	45
	6_ZG	n of virus specific contig		0	0	0/2		16_TC2	n of virus specific contig		0	0	0/2
		n of virus specific reads	Redundant	1440	1527				n of virus specific reads	Redundant	2585	3933
			RPMR	67	71					RPMR	110	167
		coverage	%	71.5	48				coverage	%	77	59
	7_NG	n of virus specific contig		0	0	0/3		17_LB	n of virus specific contig		0	0	0/6
		n of virus specific reads	Redundant	973	1006				n of virus specific reads	Redundant	2470	2680
			RPMR	76	78					RPMR	105	114
		coverage	%	51.5	34				coverage	%	80	60
	8_MT	n of virus specific contig		0	0	0/1		18_AS	n of virus specific contig		0	0	0/4
		n of virus specific reads	Redundant	1905	1843				n of virus specific reads	Redundant	2255	4300
			RPMR	96	92					RPMR	114	217
		coverage	%	70.5	49				coverage	%	77	56
	9_MR	n of virus specific contig		0	0	0/4		19_TB	n of virus specific contig		0	0	0/8
		n of virus specific reads	Redundant	1604	1680				n of virus specific reads	Redundant	850	899
			RPMR	87	91					RPMR	56	59
		coverage	%	71.5	45				coverage	%	62	43
	10_V	n of virus specific contig		0	0	0/2						*Vitis vinifera hit
		n of virus specific reads	Redundant	1909	1971
			RPMR	81	84
		coverage	%	72	51
		RPMR=	number of redundant virus specific reads/million sequenced reads

## Sheet: Table S4
Table S4
Sequence and annealing temperatures of the used of PCR primers for virus detection with their appropriate references
Primer Name	Primer Sequence (5'-3')	Position on the reference genome	amplified product	anelling temperature	Funcion of the amplified region	Genome used as a reference	Reference
GVT_7630F	GTGTGGTCCTCGTTAGGTGC	7630-7649	904 bp	65	coat protein-3'UTR	NC_035203	this work
GVT_8534R	CGGCAAGAGTTCCAACTAGC	8534-8515					Glasa et al 2018
GVT-ORF5-F	ATGTAYTACTCYAARGTRATATGG	8132-8155	303 bp	55	coat protein-3'UTR	NC_035203	Diaz-Lara et al 2020
GVT-ORF5-R	ATTGTARCTGGRGCDCCC	8434-8416

## Sheet: Table S5
Table S5
List of sampled varieties in the vineyards together with the result of GVT specific RT-PCR
Library code	Variety	Number of tested plant	GVT
1_TK	Kékfrankos	10	10/10
2_PH	Olaszrizling - Welschriesling	10	9/10
3_HT	Chardonnay	10	0
4_PP	Cabernet Sauvignon	10	7/10
5_CS	Csabagyöngye - Pearl of Csaba	2	2
6_MP	Merlot	10	0
7_FP	Generosa	10	0
8_ET	Kadarka	10	10/10
9_SZHT	Furmint	5	4(5)/5
10_EH	Furmint, old *	5	4(5)/5
11_SZHU	Furmint, new	5	0
12_DF	Furmint, old*	8	8/8
13_BV	Old Hungarian varieties	5	5/5
14_MK1	Furmint T85●	2	2
15_MK3	Hárslevelű K3●	1	0
16_MK4	Sárgamuskotály●	1	0
17_MK5	Teleki-Kober 125●	1	0
18_MK7	Teleki-Kober 5C●	1	1
	● same plantation, different rows

## Sheet: Table S6
Table S6
List of sampled varieties in the rootstock plantations together with the result of GVT specific RT-PCR
Library code	Variety		Number of tested plant	GVT		Library code	Variety		Number of tested plant	GVT
1_BSZ	1	Fercal	2			11_P		*variety collection
	2	S.O.4	7			12_KSZ	1	5C	8
2_BB	1	5C	6				2	Fercal	1
	2	125AA	3				3	S.O.4	2
	3	Fercal	3				4	125AA	2
3_FH	1	5C	6				5	Paulsen	2
	2	Fercal	6	+			6	Ruggeri	1
4_BH	1	Fercal	8				7	Richter	1	+
5_ZE	1	Ruggeri	2			13_SZ	1	5BB	3
	2	Georgikon	2				2	Fercal	9
	3	125AA	3			14_AD	1.5	5C	14
	4	5BB	4				2	5BB	1
	5	Fercal	3				3	125AA	2
	6	S.O.4	2				4	Fercal	1
	7	5C	2			15_TC		*variety collection
6_ZG	1	5BB	5			16_TC2	1	5C	7
	2	Fercal	4				2	Ruggeri	1
7_NG	1	5BB	5				3	Harselevelu	1
	2	Fercal	2			17_LB	1	Fercal	3
	3	S.O.4	3				2	S.O.4	2
8_MT	1	Fercal	10				3	5BB	1
	2	Fercal	1				4	Börner	2
9_MR	1	5C old	5				5	5C	1
	2	Georgikon	1				6	Georgikon	2
	3	Berlandieri	1			18_AS	1, 4	5C	5
	4	5C young	4				2	S.O.4	2
10_V	1	5BB	7				3	Ruggeri	2
	2	5C	4			19_TB	1	5BB	8

## Sheet: Table S7
Table S7
List of sampled varieties in the rootstock variety collections together with the result of GVT specific RT-PCR
11_P		GVT		15_TC		GVT
1	Teleki 8B			1	Aramon x Riparia 143
2	Teleki 5C I.			2	Aramon x Rupestris G1	+
3	Teleki-Kober 5BB			3	Berlandieri x Riparia
4	Szilágyi 157 Pécs			4	Solonis x Riparia 1615
5	Riparia portalis			5	Baco1
6	Rupestris du Lot			6	Adamovics	+
7	Rupestris metallica			7	Richter 110
8	Chasselas x Berlandieri 41B M. et de G.			8	Solonis x Riparia 1616	+
9	Aramon x Rupestris G.1			9	Vitis solonis
10	Aramon x Riparia 143B M. et de G.			10	Berlandieri x Riparia 5C Goethe
11	Mourvédre x Rupestris 1202 C.			11	Berlandieri x Riparia 5C Erős
12	Rupestris x Berlandieri T. 10A			12	Berlandieri x Riparia Szilágyi 157
13	Solonis x Riparia 1616 C			13	Berlandieri x Riparia Eger
14	Golia			14	Berlandieri x Riparia T5C	+
15	Gagliardo			15	Rupestris Borsique 93-5
16	Riparia x Rupestris 101-14 M et de G.			16	Berlandieri x Riparia T8B
17	Riparia Martin de Perrier			17	Belandieri x Riparia T.G. 5.A.5.
18	Teleki-Fuhr S.O.4			18	Fercal	+
19	Teleki 5C Gm.6			19	Rupestris Martin
20	Teleki 5C Gm.10			20	Golia	+
21	Teleki-Kober 5BB Gm.13			21	Riparia Cordifolia
22	Teleki-Kober 5BB Wei.48			22	Gagliardo
23	Teleki 5C Wed.	+		23	Riparia Portalis	+
24	Teleki-Kober 5BB Fr.148			24	Riparia x Rupestris 3309 (beteg)
25	Teleki-Kober 5BB			25	Riparia Tomentosa	+
26	Teleki 5C II.	+		26	Riparia Sauvage
27	Teleki 5C P	+		27	Riparia x Rupestris 101/14
28	Teleki-Kober 5BB P.XII.4			28	Riparia Selecta	+
29	Teleki-Kober 5BB P.XVIII.37			29	Riparia x Rupestris 161/49 C
30	Teleki-Kober 5BB Cr.2			30	Ruggeri 140
31	Börner			31	Rupestris du Lot	+
32	Fercal			32	Rupestris x Berlandieri T 10 A
33	Richter 110			33	Rupestris Metalica
34	Ruggeri 140
